# Supplementary material
Source: PubMed Central journal article supplement (PMC5292063)
Supplement: NIHMS827061-supplement-1.pdf [file NIHMS827061-supplement-1.pdf]

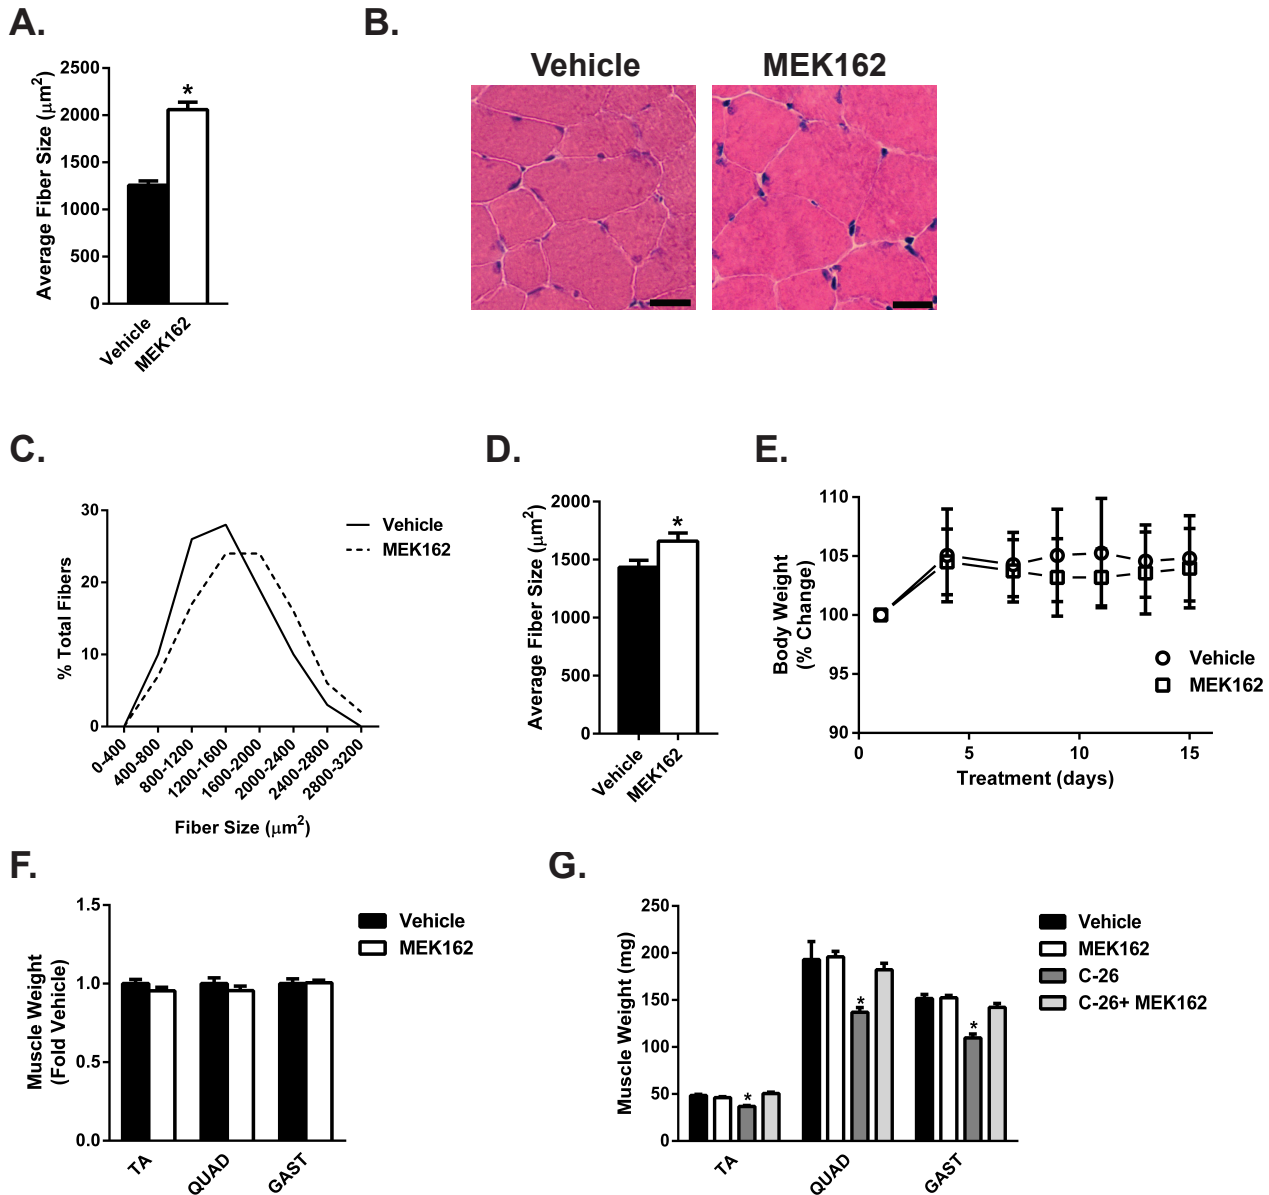

**Supplementary Figure 1. MEK162 treatment prevents cancer-induced weight loss and muscle wasting.** (A) Mice bearing C-26 tumors and treated with MEK162 have significantly larger average GAST muscle fiber sizes compared to vehicle-treated mice (A log transformation was performed to eliminate heteroscedasticity). (B) Representative cross-sections demonstrating muscle fiber size from vehicle and MEK162-treated mice bearing LLC tumors. Scale bar = 20  $\mu\text{m}$  (C) Treatment of mice bearing LLC tumors with MEK162 results in a right shift of GAST muscle fiber cross-sectional areas. (D) Mice bearing LLC tumors treated with MEK162 have significantly larger average GAST muscle fiber sizes compared to vehicle-treated mice. (E) Treatment of control, non-tumor-bearing CD2F1 mice with MEK162 does not alter mouse body weight. (F) Treatment of control, non-tumor-bearing CD2F1 mice with MEK162 does not increase muscle mass. (G) Treatment of C-26 bearing mice with MEK162 results in muscle masses that are similar to those of control mice without tumors. Data are presented as mean  $\pm$  standard error of the mean (SEM).  $n=5-7/\text{group}$ , \* =  $p < 0.05$  compared to vehicle-treated mice.

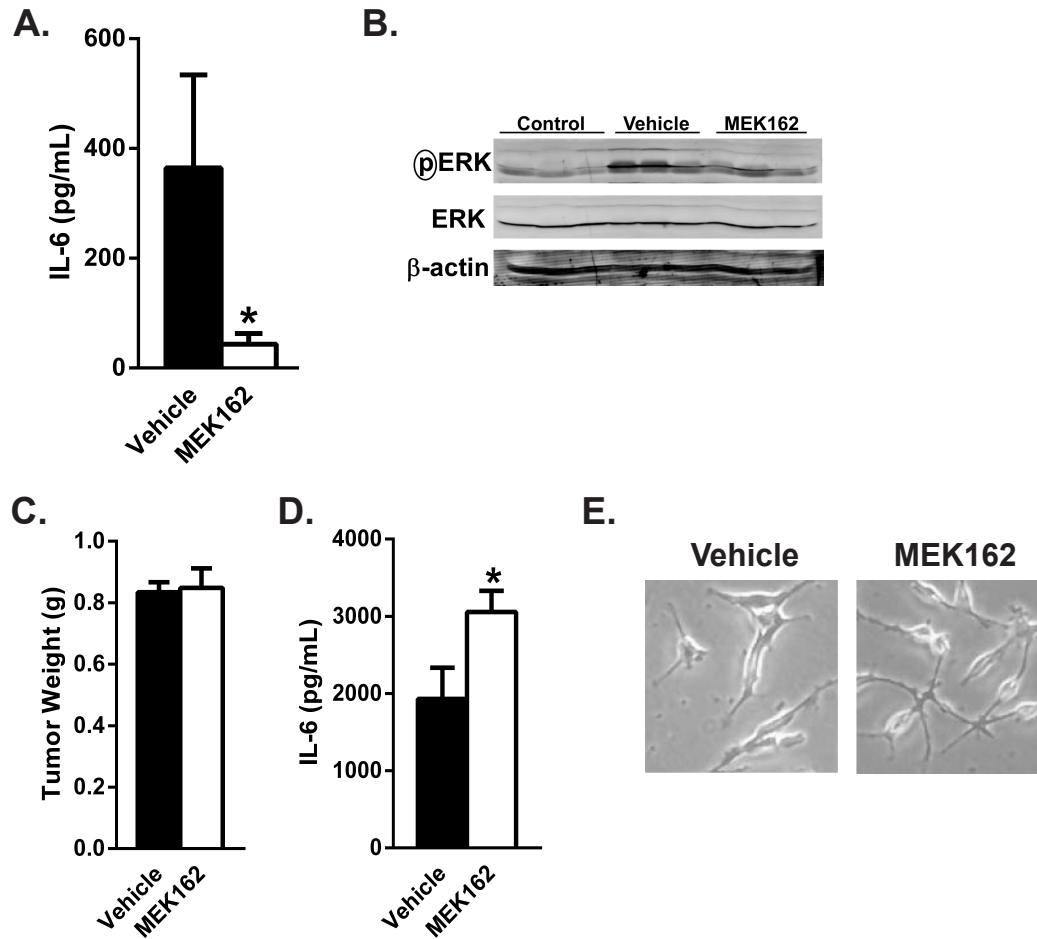

**Supplementary Figure 2. Development of a MEK162 resistant C-26 tumor cell line.**

(A) MEK162 treatment reduces serum IL-6 levels of C-26 tumor-bearing mice. (B) C-26 induced-cachexia activates ERK signaling in QUAD muscle compared to control, non-tumor-bearing mice, and treatment with MEK162 decreases ERK activation in muscle. (C) MEK162 treatment has no impact on C-26R tumor weight at the 19 day time point. (D) MEK162 treatment leads to an increase in serum IL-6 in C-26R tumor-bearing mice, supporting that C-26R cells are resistant to MEK162 in vivo. (E) C-26R cells appear morphologically different than C-26 cells, with C-26 cells exhibiting a rounded phenotype, while C-26R cells are elongated and display cellular projections. Data are presented as mean  $\pm$  standard error of the mean (SEM). n=5-11/group, \* = p<0.05 compared to vehicle-treated mice.

**A.**

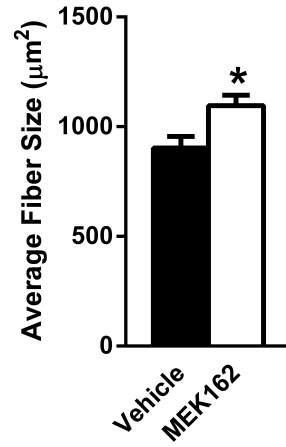

**Supplementary Figure 3. MEK162 prevents cancer-induced weight loss and muscle wasting in part via a tumor extrinsic mechanism. (A)** C-26R tumor-bearing mice have increased average GAST fiber cross-sectional area. Data are presented as mean  $\pm$  standard error of the mean (SEM). n= 5/group, \* = p<0.05 compared to vehicle-treated mice.

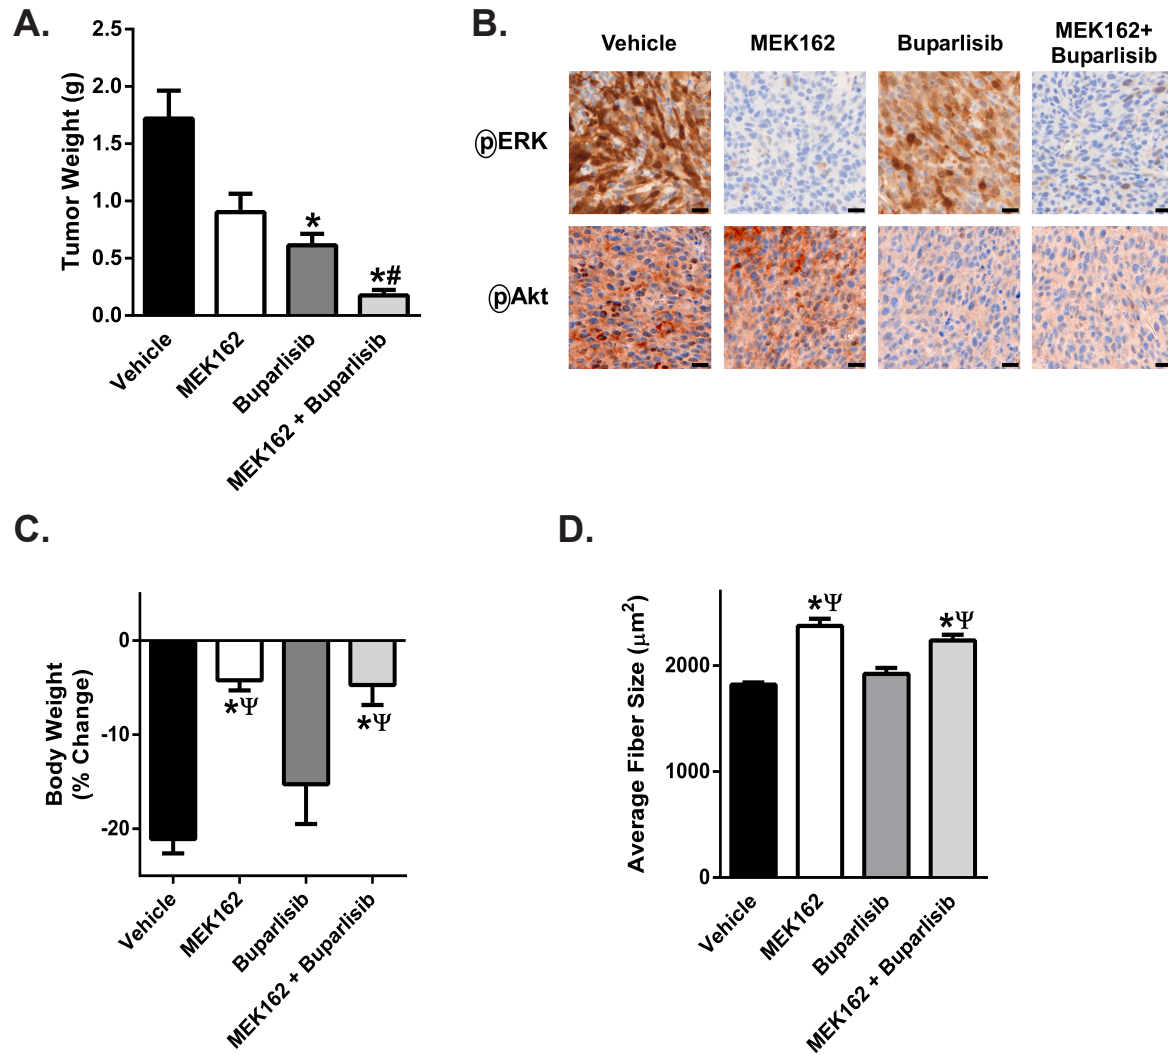

**Supplementary Figure 4. MEK162 prevents cancer-induced weight loss and muscle wasting when used in combination with buparlisib.** (A) Buparlisib was sufficient to decrease tumor weight, with MEK162+ buparlisib further decreasing tumor weight (A log transformation was performed to eliminate heteroscedasticity). (B) MEK162 and buparlisib have on-target effects, and on-target effects are maintained when MEK162 and buparlisib are dosed in combination. (C) Vehicle-treated mice lost more body mass than mice treated with MEK162 alone or in combination with buparlisib. (D) Treatment of C-26 tumor-bearing mice with MEK162 either alone or in combination with buparlisib results in increased average GAST muscle fiber cross-sectional area (CSA) compared to vehicle-treated mice (A log transformation was performed to eliminate heteroscedasticity). Data are presented as mean  $\pm$  standard error of the mean (SEM). n=5-6/group. \* =  $p < 0.05$  compared to vehicle-treated mice. # =  $p < 0.05$  versus both single agent MEK162 and single agent buparlisib.  $\Psi$  =  $p < 0.05$  versus single agent buparlisib.

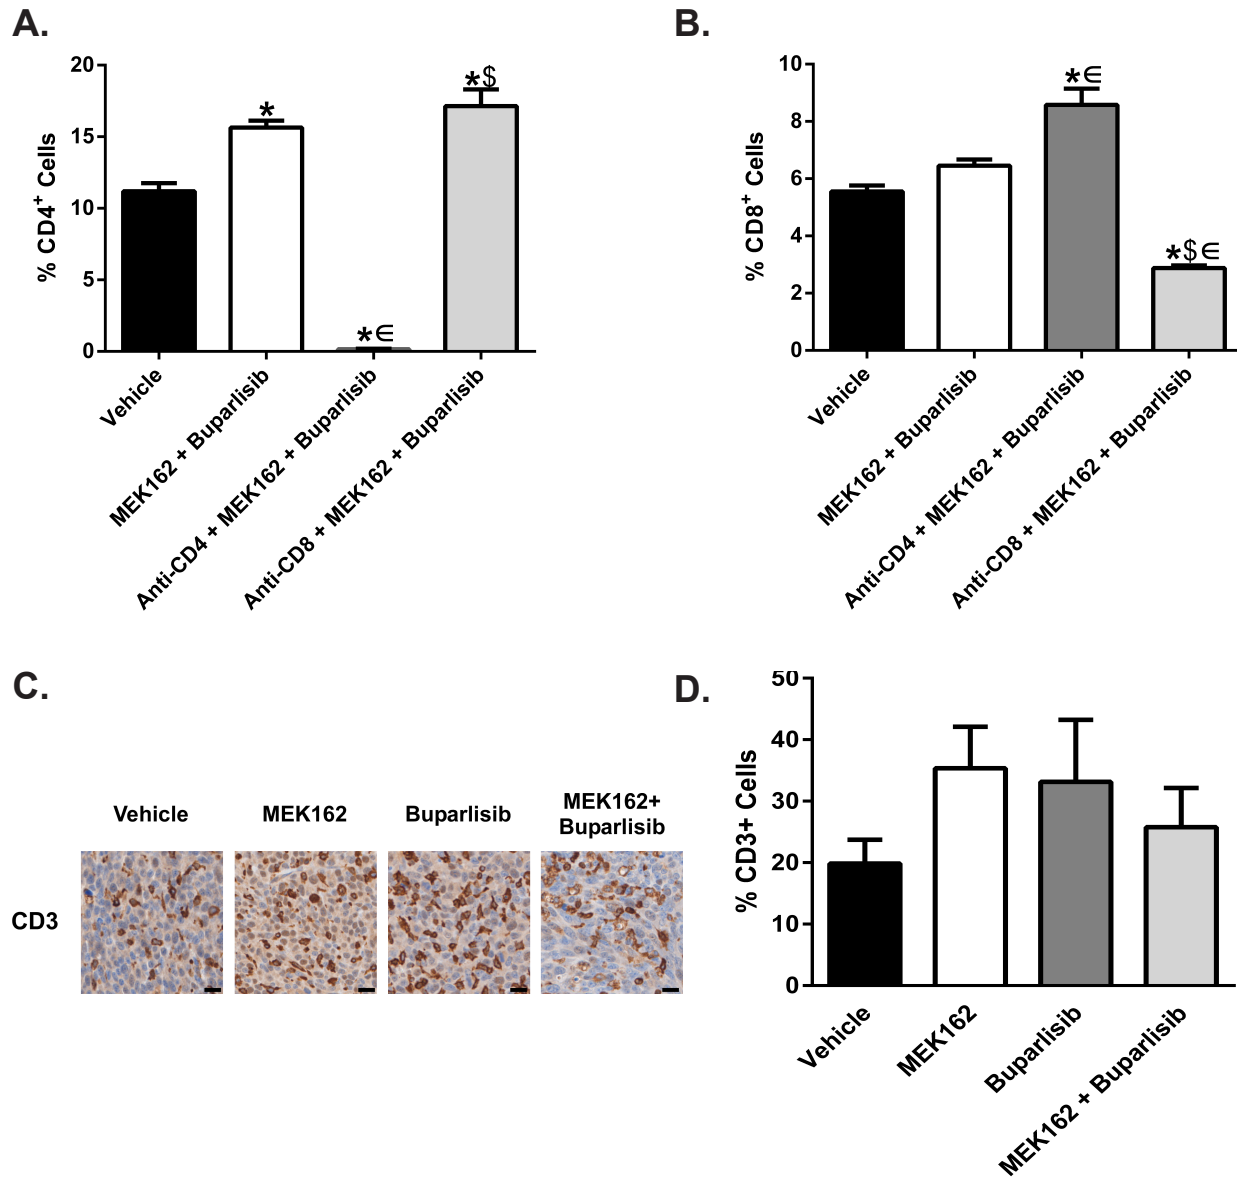

**Supplementary Figure 5. MEK162 and buparlisib modulate immune biomarkers.**

(A) CD4+ cell depletion was effective, as the number of splenic CD4+ T cells is reduced in mice treated with anti-CD4 antibody. (B) CD8+ cell depletion was effective, as the number of CD8+ T cells was decreased in mice treated with anti-CD8 antibody. (C) Representative images of CD3+ cells in C-26 tumors. (D) Infiltration of CD3+ cells in tumors does not differ between groups. Data are presented as mean  $\pm$  standard error of the mean (SEM).  $n=5-6$ /group. \* =  $p<0.05$  compared to vehicle-treated mice. € =  $p<0.05$  versus MEK162 + buparlisib. § =  $p<0.05$  versus Anti-CD8 + MEK162 + buparlisib.

| Gene             | Primer Pairs                                                       | Size (bp) |
|------------------|--------------------------------------------------------------------|-----------|
| <i>Atrogin-1</i> | 5' - AGATTCGCAAGCGTTTGATC - 3'<br>5' - GGGAAAGTGAGACGGAGCAG - 3'   | 204       |
| <i>MuRF1</i>     | 5' - TGGCGATTGTCACAAAGTGG - 3'<br>5' - CCCTCTCTAGGCCACCGAGT - 3'   | 100       |
| <i>Mul1</i>      | 5' - AGGGCATTCTTTCAGAAGCA - 3'<br>5' - GGGGTGGAAGTCTCTCGTACA - 3'  | 329       |
| <i>Musal</i>     | 5' - CAGAGGATTGGGACGGGACG - 3'<br>5' - GTGAGTGCTGCTGTACCTCTT - 3'  | 167       |
| <i>Atg5</i>      | 5' - ATCAGACCACGACGGAGCGG - 3'<br>5' - GGCGACTGCGGAAGGACAGA - 3'   | 116       |
| <i>Bnip3</i>     | 5' - CAGAGCGGGGAGGAGAAC - 3'<br>5' - GAGGCTGGAACGCTGCTC - 3'       | 80        |
| <i>GAPDH</i>     | 5' - AGCCTCGTCCCGTAGACAAAA - 3'<br>5' - GCCTTGACTGTGCCGTTGATT - 3' | 199       |

**Supplementary Table 1. Primer sequences used for real-time RT-PCR.**
